# Supplementary material for: Mechanism Analysis of PFHxS Purification in Water Using Nanofiltration under the Coexistence of Sodium Alginate and Ca2+ Based on DFT
Source: MDPI journal article supplement (doi:10.3390/w15040792), 2023-02-17
Supplement: s1 [file s1]

Archive with 1 entries (1 files):
- water-2177498-supplementary.pdf
