# Supplementary material for: Mechanism Analysis of PFHxS Purification in Water Using Nanofiltration under the Coexistence of Sodium Alginate and Ca2+ Based on DFT
Source: MDPI journal article supplement (doi:10.3390/w15040792), 2023-02-17
Supplement: s1 [file s1 › water-2177498-supplementary.pdf]

## Supplementary Materials

### Mechanism Analysis of PFHxS Purification in Water by Nanofiltration under the Coexistence of Sodium Alginate and $\text{Ca}^{2+}$ Based on DFT

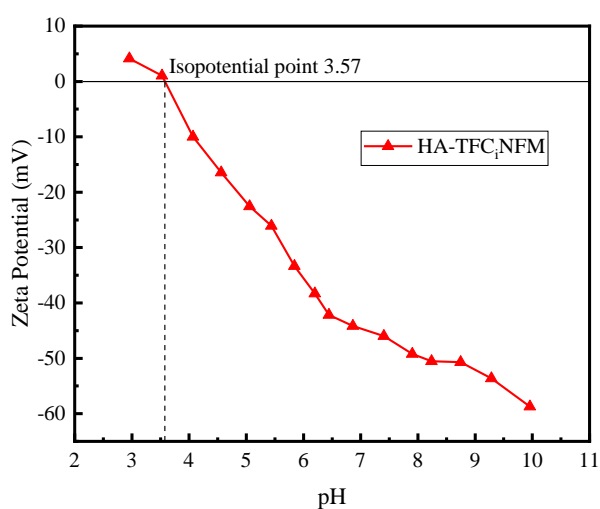

**Figure S1.** Zeta potential of HA-TFCiNFM.

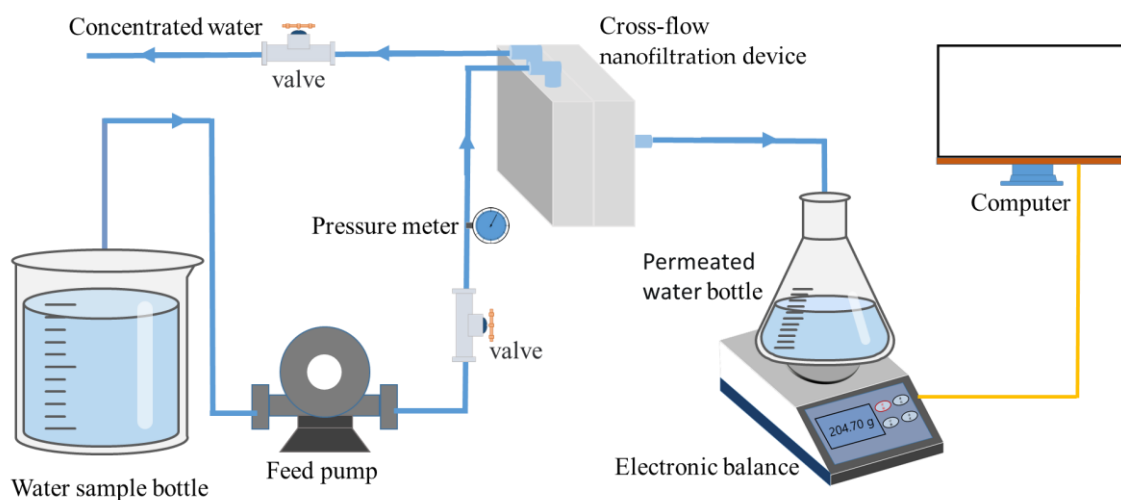

**Figure S2.** Schematic diagrams of the homemade cross-flow nanofiltration system.

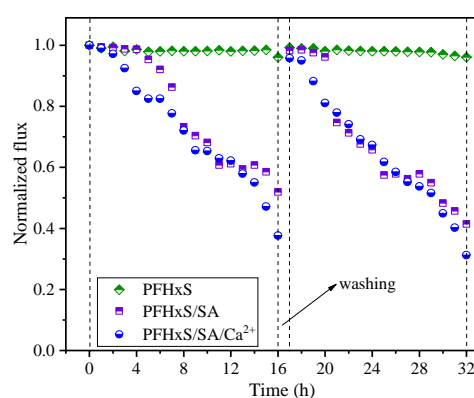

**Figure S3.** Changes in normalized flux with filtration time for HA-TFC/NFM under PFHxS/SA/Ca<sup>2+</sup> system.

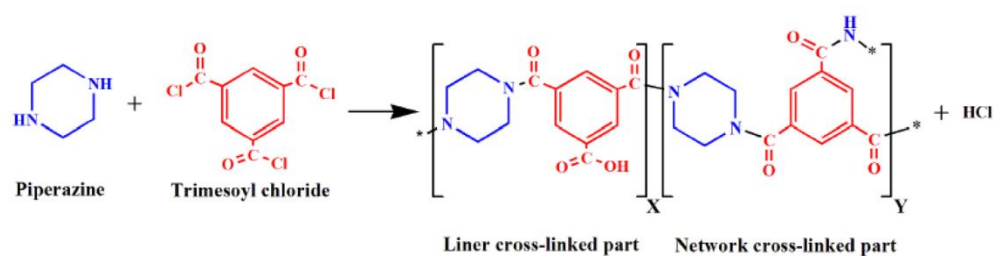

**Figure S4.** IP mechanism of PIP and TMC.

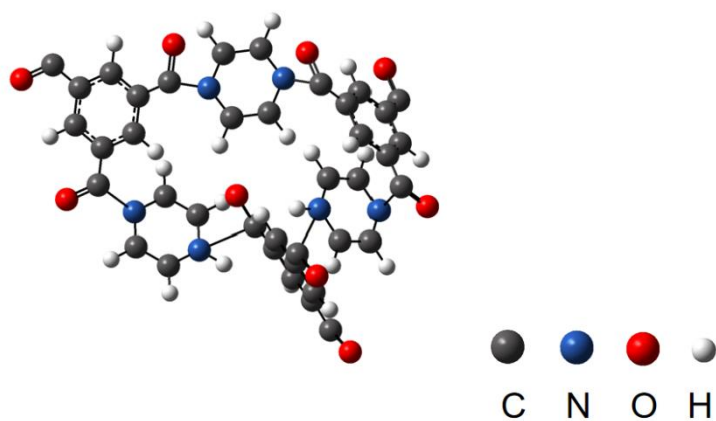

**Figure S5.** Three-dimensional structure of the membrane surface.

**Table S1.** The physical and chemical properties of PFHxS.

| Acronym | MW (g mol <sup>-1</sup> ) | Structure                                                                         | pK <sub>a</sub> | Log (K <sub>ow</sub> ) | Stokes radius (nm) |
|---------|---------------------------|-----------------------------------------------------------------------------------|-----------------|------------------------|--------------------|
| PFHxS   | 400.1                     | 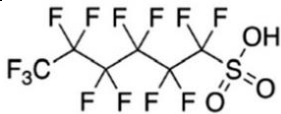 | 0.14            | 3.16                   | 0.59               |
